# Supplementary material for: Discovery and Development Strategies for SARS-CoV-2 NSP3 Macrodomain Inhibitors
Source: MDPI journal article supplement (doi:10.3390/pathogens12020324), 2023-02-15
Supplement: s1 [file s1]

# **Discovery and development strategies for SARS-CoV-2 NSP3 macrodomain inhibitors**

Marion Schuller<sup>1\*</sup>, Tryfon Zarganes-Tzitzikas<sup>2</sup>, James Bennett<sup>2</sup>, Stephane De Cesco<sup>2</sup>,  
Daren Fearon<sup>3,4</sup>, Frank von Delft<sup>2,3,4,5,6</sup>, Oleg Fedorov<sup>2</sup>, Paul E. Brennan<sup>2</sup>, Ivan Ahel<sup>1\*</sup>

<sup>1</sup>*Sir William Dunn School of Pathology, University of Oxford, Oxford OX1 3RE, UK*

<sup>2</sup>*Centre for Medicines Discovery, University of Oxford, Headington OX3 7DQ, UK*

<sup>3</sup>*Diamond Light Source Ltd., Harwell Science and Innovation Campus, Didcot OX11 0DE, UK*

<sup>4</sup>*Research Complex at Harwell, Harwell Science and Innovation Campus, Didcot OX11 0FA, UK*

<sup>5</sup>*Structural Genomics Consortium, University of Oxford, Headington OX3 7DQ, UK*

<sup>6</sup>*Department of Biochemistry, University of Johannesburg, Auckland Park 2006, South Africa*

\*Corresponding author: [ivan.ahel@path.ox.ac.uk](mailto:ivan.ahel@path.ox.ac.uk); [marion.schuller@path.ox.ac.uk](mailto:marion.schuller@path.ox.ac.uk)

## **SUPPLEMENTARY FIGURES AND TABLES**

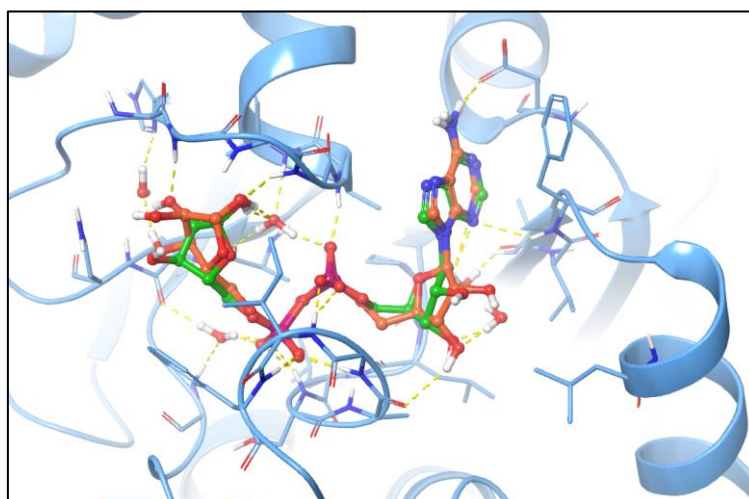

**Figure S1.** Redocking of ADP-ribose (orange sticks) in the NSP3 macrodomain (blue ribbon and sticks) yields a ligand structure with an overlap of RMSD 1.05 Å compared to the X-ray structure (green sticks).

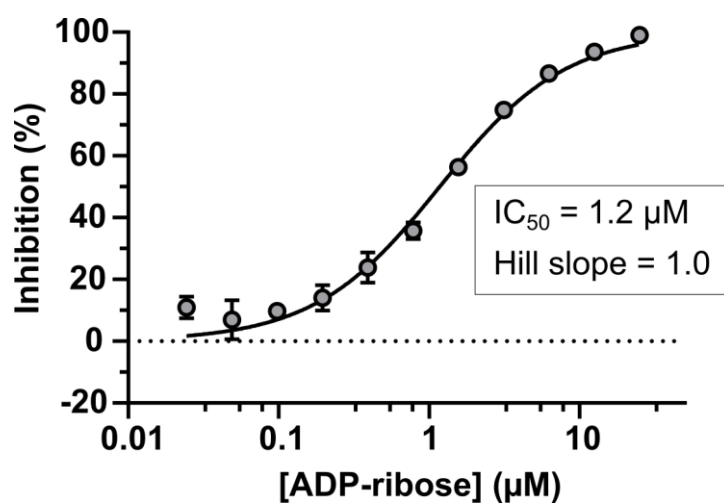

**Figure S2.** ADP-ribose is used as positive control and reference compound in the HTRF-based assay for inhibitor screening and characterisation for SARS-CoV-2 NSP3 Mac1. A dose-response titration is shown with IC<sub>50</sub> and Hill slope parameter provided in the inset.

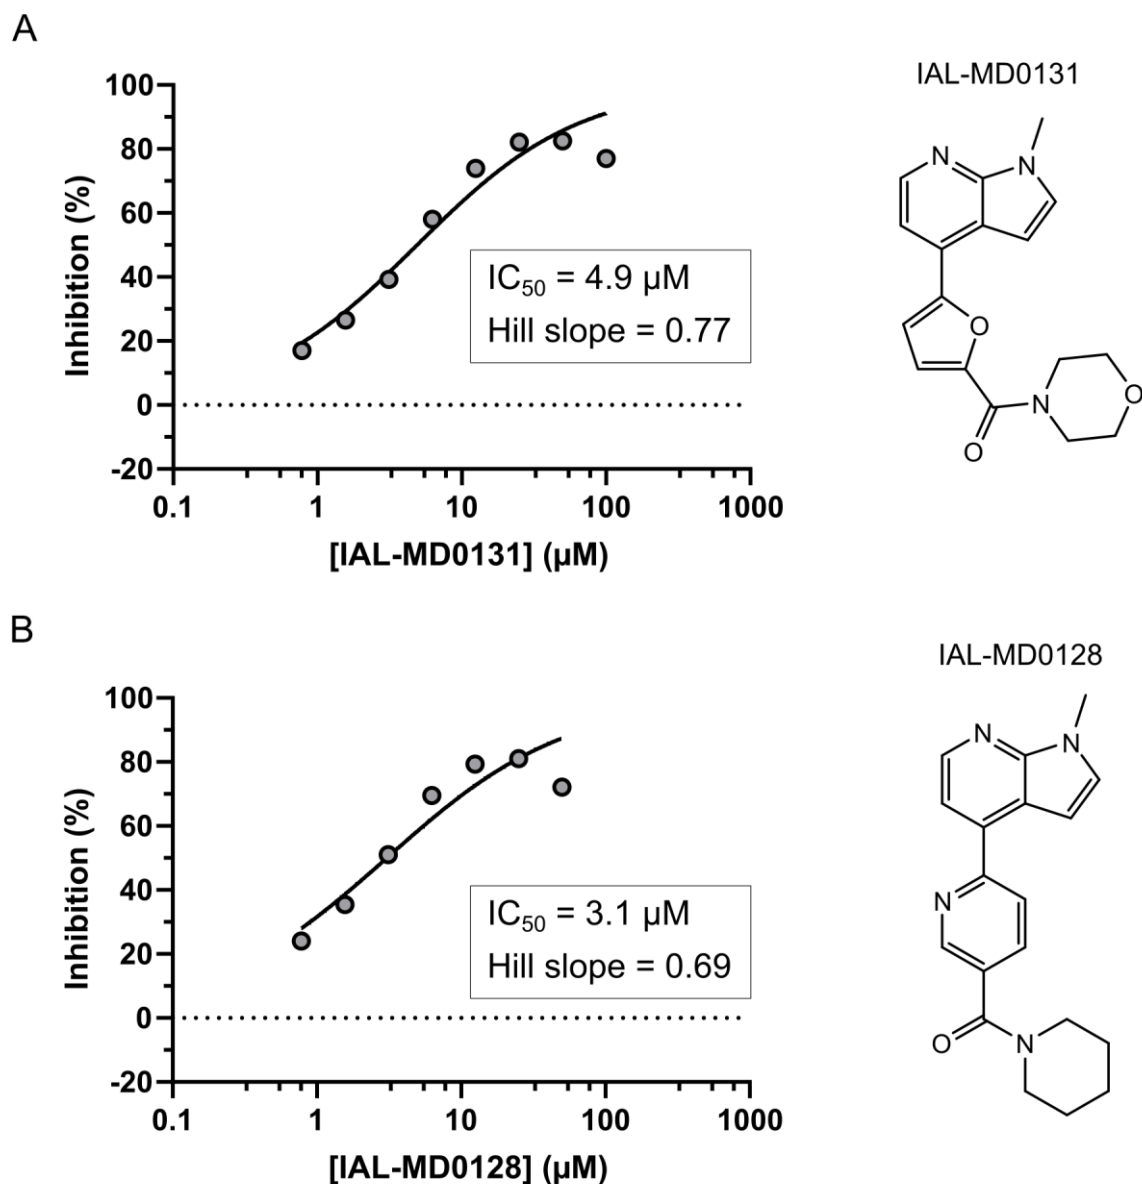

**Figure S3. Dose-response titrations of MIDAS compound library hits leading regarding NSP3 Mac1 inhibitory activity.** (A) IAL-MD0131 belongs to the scaffold type I group. (B) IAL-MD0128 belongs to scaffold type II group. Data point for highest concentration of IAL-MD0128 was excluded. Respective  $IC_{50}$  and Hill slope parameters are provided in the insets, the molecular structures on the right.

**Supplementary Table S1. Data collection and refinement statistics for crystal structures described in this study.**

|                                                                                                                                                   | SARS-CoV-2 NSP3 Mac1<br>in complex with IAL-MD0131 | SARS-CoV-2 NSP3 Mac1<br>in complex with aztreonam |
|---------------------------------------------------------------------------------------------------------------------------------------------------|----------------------------------------------------|---------------------------------------------------|
| PDB accession code                                                                                                                                | 8C19                                               | 8C1A                                              |
| <b>Data Collection</b>                                                                                                                            |                                                    |                                                   |
| Synchrotron/beam line                                                                                                                             | DLS/I03                                            | DLS/I03                                           |
| Wavelength (Å)                                                                                                                                    | 0.896844                                           | 0.97623                                           |
| Space group                                                                                                                                       | <i>P</i> 4 <sub>3</sub>                            | <i>P</i> 4 <sub>3</sub>                           |
| a (Å)                                                                                                                                             | 88.604                                             | 88.4745                                           |
| b (Å)                                                                                                                                             | 88.6043                                            | 88.4745                                           |
| c (Å)                                                                                                                                             | 39.8265                                            | 39.139                                            |
| α (°)                                                                                                                                             | 90                                                 | 90                                                |
| β (°)                                                                                                                                             | 90                                                 | 90                                                |
| γ (°)                                                                                                                                             | 90                                                 | 90                                                |
| Content of AU                                                                                                                                     | 2                                                  | 2                                                 |
| Resolution (Å) <sup>a</sup>                                                                                                                       | 39.63 - 1.95<br>(2.02 - 1.95)                      | 62.56 - 1.9<br>(1.94 - 1.9)                       |
| R <sub>sym</sub> (%) <sup>a,b</sup>                                                                                                               | 0.318 (2.285)                                      | 0.024 (0.044)                                     |
| I/σ(I)                                                                                                                                            | 5.72 (1.19)                                        | 64.34 (21.01)                                     |
| Completeness (%) <sup>a</sup>                                                                                                                     | 100.0 (100.0)                                      | 95.2 (72.1)                                       |
| Redundancy <sup>a</sup>                                                                                                                           | 13.4 (13.9)                                        | 10.8 (4.8)                                        |
| CC <sub>1/2</sub> (%) <sup>a</sup>                                                                                                                | 0.996 (0.603)                                      | 1 (0.983)                                         |
| Unique reflections <sup>a</sup>                                                                                                                   | 22915 (1607)                                       | 22970 (1085)                                      |
| <b>Refinement</b>                                                                                                                                 |                                                    |                                                   |
| R <sub>cryst</sub> (%) <sup>c</sup>                                                                                                               | 0.1904 (0.3096)                                    | 0.1806 (0.2010)                                   |
| R <sub>free</sub> (%) <sup>d</sup>                                                                                                                | 0.2313 (0.3237)                                    | 0.2238 (0.2526)                                   |
| RMSD bond length (Å)                                                                                                                              | 0.010                                              | 0.009                                             |
| RMSD bond angle (°)                                                                                                                               | 1.61                                               | 1.68                                              |
| Amino acids <sup>e</sup>                                                                                                                          | 334 (28.66)                                        | 334 (20.47)                                       |
| Water <sup>e</sup>                                                                                                                                | 133 (32.13)                                        | 138 (23.40)                                       |
| Ligands <sup>e</sup>                                                                                                                              | 1 (49.66)                                          | 1 (32.25)                                         |
| Ions <sup>e</sup>                                                                                                                                 | 0                                                  | 0                                                 |
| <b>Ramachandran plot</b>                                                                                                                          |                                                    |                                                   |
| Favoured (%)                                                                                                                                      | 98.18                                              | 98.78                                             |
| Allowed (%)                                                                                                                                       | 1.82                                               | 0.91                                              |
| Disallowed (%)                                                                                                                                    | 0.00                                               | 0.30                                              |
| (a) Data for the highest resolution shell are given in parentheses.                                                                               |                                                    |                                                   |
| (b) $R_{sym} = \sum  I  / \sum \langle I \rangle$ , where $I$ is measured density for reflections with indices $hkl$ .                            |                                                    |                                                   |
| (c) $R_{cryst} = \sum   F_{obs}  -  F_{calc}   / \sum  F_{obs} $ .                                                                                |                                                    |                                                   |
| (d) R <sub>free</sub> has the same formula as R <sub>cryst</sub> , except that calculation was made with the structure factors from the test set. |                                                    |                                                   |
| (e) Number of atoms followed the average B factor in brackets.                                                                                    |                                                    |                                                   |

**Supplementary Table S2. Top hit compounds from virtual screening approach.** Only hit compounds showing more than 30% NSP3 macrodomain inhibition are listed.

| Compound library ID | Compound internal ID | Nsp3 macrodomain inhibition at 25 $\mu$ M (%) | Error (%) | IC <sub>50</sub> in $\mu$ M (Inhibition at top screening concentration of 187 $\mu$ M) | SMILES                                                                     |
|---------------------|----------------------|-----------------------------------------------|-----------|----------------------------------------------------------------------------------------|----------------------------------------------------------------------------|
| BCC0086077          | ---                  | 67.8                                          | 0.7       | ---                                                                                    | <chem>Cc1cc2nn(-c3ccccc3)nc2cc1N</chem>                                    |
| BCC0122573          | IAL-MD0306           | 63.7                                          | 0.1       | 18.0 (81.3%)                                                                           | <chem>COc1cc2c(cc1/C=C/C(=O)O)OC(C)C2</chem>                               |
| BCC0111915          | ---                  | 62.9                                          | 10.9      | ---                                                                                    | <chem>O=c1c(O)c(-c2cccs2)oc2ccccc12</chem>                                 |
| BCC0119417          | ---                  | 59.3                                          | 1.3       | ---                                                                                    | <chem>CC(=O)c1ccc(-c2ccc(N)cc2)o1</chem>                                   |
| BCC0125028          | ---                  | 57.5                                          | 0.9       | ---                                                                                    | <chem>O=c1ccsn1-c1ccc(F)c(Cl)c1</chem>                                     |
| BCC0121661          | ---                  | 56.9                                          | 0.1       | ---                                                                                    | <chem>Nc1ccc2c(c1)C/C(=C/c1ccco1)C2=O</chem>                               |
| BCC0091906          | ---                  | 56.2                                          | 0.2       | ---                                                                                    | <chem>Nc1ccc2nc3c(=O)[nH]c(=O)[nH]c3nc2c1</chem>                           |
| BCC0115778          | IAL-MD0305           | 56.2                                          | 3.5       | 28.0 (63.1%)                                                                           | <chem>CC(=O)c1ccc(-c2ccc(N)cc2)s1</chem>                                   |
| BCC0002149          | ---                  | 47.2                                          | 0.4       | ---                                                                                    | <chem>COc1cc(/C=C2\Oc3cc(O)ccc3C2=O)ccc1O</chem>                           |
| BCC0083752          | ---                  | 46.8                                          | 2.9       | ---                                                                                    | <chem>CN(C)c1ccc(-c2ccc3ccccc3n2)cc1</chem>                                |
| BCC0117785          | ---                  | 39.3                                          | 0.4       | ---                                                                                    | <chem>COc1cc(/C=C/C(=O)c2cc3ccccc3o2)cc(Br)c1O</chem>                      |
| BCC0093974          | ---                  | 38.6                                          | 1.3       | ---                                                                                    | <chem>Oc1cc2ccccc2nc1-c1ccccc1</chem>                                      |
| BCC0032304          | ---                  | 36.4                                          | 1.6       | ---                                                                                    | <chem>CCN1C(=O)c2ccccc3c(S(=O)(=O)O)ccc1c23</chem>                         |
| BCC0071692          | ---                  | 35.0                                          | 2.0       | ---                                                                                    | <chem>Oc1nc2ccccc2nc1-c1c[nH]c2ccccc12</chem>                              |
| BCC0019152          | ---                  | 32.7                                          | 0.6       | ---                                                                                    | <chem>CN(C)S(=O)(=O)c1ccc2nc(C(=O)O)n(O)c2c1</chem>                        |
| BCC0030992          | ---                  | 31.6                                          | 0.8       | ---                                                                                    | <chem>O=c1cc(-c2ccc(Cl)cc2)oc2cc(OCC(O)CS(=O)(=O)c3ccc(Cl)cc3)ccc12</chem> |
| BCC0049478          | ---                  | 30.6                                          | 0.6       | ---                                                                                    | <chem>Cc1cccn2c(=O)c3cc(C(=O)O)n(C)c3nc12</chem>                           |
| BCC0067629          | ---                  | 30.5                                          | 0.3       | ---                                                                                    | <chem>CN1C(=O)c2ccc(N3CCCC3)cc2C1=O</chem>                                 |
| BCC0105824          | ---                  | 30.1                                          | 1.4       | ---                                                                                    | <chem>Nc1ccc2oc(-c3cccn3)nc2c1</chem>                                      |

**Table S3. Hit compounds from MIDAS compound library screen.**

| Compound library ID | Compound internal ID | NSP3 Mac1 inhibition at 25 $\mu$ M (%) | Error (%) | SMILES                                                         | Scaffold type                                  |
|---------------------|----------------------|----------------------------------------|-----------|----------------------------------------------------------------|------------------------------------------------|
| ARUK4000671-001-001 | ---                  | 106.5                                  | 0.18      | <chem>O=C(Nc1ccc2cc[nH]c2c1)c1csc(n1)NCC1CCCO1</chem>          | Excluded based on assay interference potential |
| ARUK4007189-001-001 | ---                  | 73.1                                   | 0.33      | <chem>COCCNC(=O)c1ccc(o1)-c1ccnc2n(ccc12)C</chem>              | I                                              |
| ARUK4004310-001-001 | ---                  | 61.0                                   | 7.02      | <chem>CC(=O)N1CCc2nc(c(c(c2C1)-c1cccc(c1)-c1ccco1)C#N)N</chem> | Excluded based on assay interference potential |
| ARUK4010026-001-001 | IAL-MD0017           | 58.7                                   | 0.34      | <chem>Nc1c(sc2nc(ccc12)-c1ccccc1)C(=O)NC1CC1</chem>            | Other                                          |
| ARUK4007069-001-001 | IAL-MD0128           | 58.0                                   | 0.82      | <chem>Cn1ccc2c(ccnc12)-c1ccc(cn1)C(=O)N1CCCCC1</chem>          | II                                             |
| ARUK4001517-001-001 | IAL-MD0129           | 55.0                                   | 0.53      | <chem>CN1CCC(C1)Cn1ccnc1-c1ccc(o1)-c1ccccc1C#N</chem>          | Other                                          |
| ARUK4002661-001-001 | IAL-MD0040           | 51.0                                   | 0.71      | <chem>CCn1ncc2c(cc(nc12)-c1cccs1)C(=O)N1CCNC(=O)C1</chem>      | III                                            |
| ARUK4002695-001-001 | IAL-MD0031           | 48.0                                   | 0.53      | <chem>COc1ccc(cc1)-c1cc(c2cc(ccc2n1)NC(=O)C)C(=O)O</chem>      | IV                                             |
| ARUK4000702-001-001 | ---                  | 45.8                                   | 0.92      | <chem>NC(=O)[C@@H]1CCCN1C(=O)c1cc(ccc1Cl)-n1cccc1</chem>       | Excluded based on assay interference potential |
| ARUK4007403-001-001 | IAL-MD0127           | 40.0                                   | 2.15      | <chem>CCOc1ccc2c(c(oc2c1OCC)C(=O)N[C@@H]1CCNC[C@H]1O)C</chem>  | Other                                          |

**Table S4. Confirmation of hit compounds and analogues for SAR information.**

| Internal compound ID    | IC <sub>50</sub> in $\mu$ M | Inhibition at top concentration of 125 $\mu$ M (%) | SMILES                                                                |
|-------------------------|-----------------------------|----------------------------------------------------|-----------------------------------------------------------------------|
| <b>Scaffold type I</b>  |                             |                                                    |                                                                       |
| IAL-MD0131              | 4.9                         | Not measurable due to compound precipitation       | <chem>O=C(C1=CC=C(C2=C3C(N(C)C=C3)=NC=C2)O1)N4CCOCC4</chem>           |
| IAL-MD0147              | 6.8                         | Not measurable due to compound precipitation       | <chem>O=C(NCC)C1=CC=C(C2=C3C(N(C)C=C3)=NC=C2)O1</chem>                |
| IAL-MD0132              | 7.2                         | Not measurable due to compound precipitation       | <chem>O=C(NC1CC1)C2=CC=C(C3=C4C(N(C)C=C4)=NC=C3)O2</chem>             |
| IAL-MD0130              | 7.6                         | Not measurable due to compound precipitation       | <chem>O=C(NC(C)C)C1=CC=C(C2=C3C(N(C)C=C3)=NC=C2)O1</chem>             |
| IAL-MD0148              | 7.7                         | Not measurable due to compound precipitation       | <chem>O=C(NCCC)C1=CC=C(C2=C3C(N(C)C=C3)=NC=C2)O1</chem>               |
| IAL-MD0133              | 8.5                         | Not measurable due to compound precipitation       | <chem>O=C(N(C)C)C1=CC=C(C2=C3C(N(C)C=C3)=NC=C2)O1</chem>              |
| IAL-MD0134              | 25.3                        | 77.8                                               | <chem>O=C(NCCCC)C1=CC=C(C2=C3C(NC=C3)=NC(N)=C2)O1</chem>              |
| <b>Scaffold type II</b> |                             |                                                    |                                                                       |
| IAL-MD0128              | 3.1                         | Not measurable due to compound precipitation       | <chem>O=C(C1=CN=C(C2=C3C(N(C)C=C3)=NC=C2)C=C1)N4CCCCC4</chem>         |
| IAL-MD0140              | 6.9                         | Not measurable due to compound precipitation       | <chem>O=C(N(C)C)C1=CN=C(C2=C3C(N(C)C=C3)=NC=C2)C=C1</chem>            |
| IAL-MD0145              | 14.0                        | 81.1                                               | <chem>CN1C=CC2=C(C3=NC=C(CN4C=CN=C4)C=C3)C=CN=C21</chem>              |
| IAL-MD0141              | 25.2                        | 81.3                                               | <chem>O=C(N1CC(N(C)C)CC1)C2=CC=C(C3=C4C(NC=C4)=NC=N3)C=C2.O=CO</chem> |
| IAL-MD0138              | 36.0                        | 79.4                                               | <chem>O=C(C1=CC=CN=C1C2=C3C(N(C)C=C3)=NC=C2)N4CCCCC4</chem>           |
| IAL-MD0143              | 45.0                        | 71.9                                               | <chem>O=C(C1=CC=C(C2=C3C(NC=C3)=NC=N2)C=C1)N4CCN(C(C)=O)CC4</chem>    |
| IAL-MD0136              | Not measurable              | 49.7                                               | <chem>O=C(N)C1=C(C2=C3C(N(C)C=C3)=NC=C2)N=CC=C1</chem>                |
| IAL-MD0142              | Not measurable              | 37.9                                               | <chem>O=C(C1=CN=C(C2=C3C(N(C)C=C3)=NC=C2)C=C1)N4CCCCC4</chem>         |
| IAL-MD0137              | Not measurable              | 25.8                                               | <chem>O=C(C1=CN=CC(C2=C3C(N(C)C=C3)=NC=C2)=N1)N4CCCCC4</chem>         |
| IAL-MD0144              | Not measurable              | 23.8                                               | <chem>O=C(N(CC)C)C1=CN=C(C2=C3C(N(C)C=C3)=NC=C2)C=C1</chem>           |
| IAL-MD0139              | Not measurable              | 21.7                                               | <chem>O=C(C1=CC(C2=C3C(N(C)C=C3)=NC=C2)=NC=C1)N4CCCCC4</chem>         |
| IAL-MD0135              | Not measurable              | 18.3                                               | <chem>O=C(C1=NC(C2=C3C(N(C)C=C3)=NC=C2)=CN=C1)N(C)C</chem>            |
| IAL-MD0114              | Not measurable              | 13.4                                               | <chem>CC1(CCC(=O)NC1)C(=O)N2CCCC(C2)C3=CNC=4N=CC=CC34</chem>          |
| IAL-MD0084              | Not measurable              | 13.2                                               | <chem>COC=1N=CC=CC1C(=O)N2CCCC(C2)C3=CNC=4N=CC=CC34</chem>            |
| IAL-MD0078              | Not measurable              | 10.5                                               | <chem>CC(=O)NC=1C=CC=C(C1)C(=O)N2CCCC(C2)C3=CNC=4N=CC=CC34</chem>     |

|                          |                |      |                                                                            |
|--------------------------|----------------|------|----------------------------------------------------------------------------|
| IAL-MD0115               | Not measurable | 9.3  | <chem>CNC(=O)C=1C=CC(=CN1)C(=O)N2CCC(CC2)C3=CNC=4N=CC=CC34</chem>          |
| IAL-MD0110               | Not measurable | 7.8  | <chem>O=C(N1CCC(CC1)C2=CNC=3N=CC=CC23)C=4C=CC(NCC5CC5)=NC4</chem>          |
| IAL-MD0146               | Not measurable | 3.7  | <chem>O=C(C1=CN=CC(C2=C3C(N(C)C=C3)=NC=C2)=N1)N4CCN(C)CC4</chem>           |
|                          |                |      |                                                                            |
| <b>Scaffold type III</b> |                |      |                                                                            |
| IAL-MD0051               | 12.6           | 59.8 | <chem>CC(C)N1N=CC=2C(=CC(=NC12)C3=CC=C(C)S3)C(=O)N4CCOCC4</chem>           |
| IAL-MD0070               | 16.3           | 83.2 | <chem>CC(C)N1N=CC=2C(=CC(=NC12)C3=CC=CO3)C(=O)N4CCNC(=O)C4</chem>          |
| IAL-MD0040               | 20.6           | 81.0 | <chem>CCN1N=CC=2C(=CC(=NC12)C3=CC=CS3)C(=O)N4CCNC(=O)C4</chem>             |
| IAL-MD0064               | 25.2           | 78.7 | <chem>CC(C)N1N=CC=2C(=CC(=NC12)C3=CC=CS3)C(=O)N4CCNC(=O)C4</chem>          |
| IAL-MD0074               | 25.3           | 77.7 | <chem>CCN1N=CC=2C(=CC(=NC12)C3=CC=CS3)C(=O)NCC(=O)N(C)C</chem>             |
| IAL-MD0108               | 67.8           | 60.5 | <chem>CC(C)N1N=CC=2C(=CC(=NC12)C3=CC=CS3)C(=O)NCC(C)N4CCCC4</chem>         |
| IAL-MD0116               | Not measurable | 55.8 | <chem>COCCN(CC(=O)N)C(=O)C=1C=C(N=C2N(C)N=C(C)C12)C3=CC=CS3</chem>         |
| IAL-MD0081               | Not measurable | 53.0 | <chem>CNC(=O)CN(C)C(=O)C=1C=C(N=C2N(C)N=C(C)C12)C3=CC=CS3</chem>           |
| IAL-MD0038               | Not measurable | 50.5 | <chem>CCN1N=CC=2C(=CC(=NC12)C3=CC=CS3)C(=O)NC=4C=C(Cl)C=CC4OC</chem>       |
| IAL-MD0086               | Not measurable | 47.7 | <chem>CC(C)N1N=CC=2C(=CC(=NC12)C3=CC=CS3)C(=O)N4CCCC(C)(O)C4</chem>        |
| IAL-MD0045               | Not measurable | 47.5 | <chem>CC1=NN(C)C=2N=C(C=C(C(=O)N3CCN(CC3)C(=O)C4CC4)C12)C=5C=CC=CC5</chem> |
| IAL-MD0083               | Not measurable | 47.4 | <chem>CC(C)N1N=CC=2C(=CC(=NC12)C3=CC=CS3)C(=O)N4CCCC4</chem>               |
| IAL-MD0073               | Not measurable | 47.0 | <chem>CC(C)N1N=CC=2C(=CC(=NC12)C3=CC=CS3)C(=O)N(C)CC=4C=C(C)ON4</chem>     |
| IAL-MD0080               | Not measurable | 45.9 | <chem>CC(C)N1N=CC=2C(=CC(=NC12)C3=CC=CS3)C(=O)N4CCCCC4C(=O)N5CCCC5</chem>  |
| IAL-MD0062               | Not measurable | 42.2 | <chem>CCN1N=CC=2C(=CC(=NC12)C3=CC=CS3)C(=O)N(C)CC(=O)NCC4=CC=CO4</chem>    |
| IAL-MD0054               | Not measurable | 41.5 | <chem>CC(=O)N1CCN(CC1)C(=O)C=2C=C(N=C3N(C)N=C(C)C23)C4=CC=CS4</chem>       |
| IAL-MD0107               | Not measurable | 40.5 | <chem>CC(C)N1N=CC=2C(=CC(=NC12)C3=CC=CS3)C(=O)N4CCC(C)(O)CC4</chem>        |
| IAL-MD0071               | Not measurable | 36.8 | <chem>CCN1N=CC=2C(=CC(=NC12)C3=CC=CS3)C(=O)N(CC=4C=CC=CN4)C(C)C</chem>     |
| IAL-MD0106               | Not measurable | 32.1 | <chem>CC(C)N1N=CC=2C(=CC(=NC12)C3=CC=CS3)C(=O)N4CCC(C)(CO)CC4</chem>       |
| IAL-MD0075               | Not measurable | 30.9 | <chem>CC(C)N1N=CC=2C(=CC(=NC12)C3=CC=CS3)C(=O)N4CCNC(=O)C4(C)C</chem>      |
| IAL-MD0044               | Not measurable | 30.2 | <chem>CC(C)N1N=CC=2C(=CC(=NC12)C=3C=CC=4OCCOC4C3)C(=O)N5CCNC(=O)C5</chem>  |
| IAL-MD0087               | Not measurable | 22.3 | <chem>CC(C)N1N=CC=2C(=CC(=NC12)C3=CC=CS3)C(=O)N4CC(C)OCC4(C)C</chem>       |
| IAL-MD0042               | Not measurable | 20.9 | <chem>CCN1N=CC=2C(=CC(=NC12)C3=CC=CS3)C(=O)N(C)CC=4C=CC=CC4C</chem>        |
| IAL-MD0032               | Not measurable | 20.3 | <chem>CC(C)N1N=CC=2C(=CC(=NC12)C3=CC=CS3)C(=O)NC=4C=CC=C(NC(=O)C)C4</chem> |



|            |                |                |                                                                                |
|------------|----------------|----------------|--------------------------------------------------------------------------------|
| IAL-MD0095 | Not measurable | 19.8           | <chem>CC(C)N1N=CC=2C(=CC(=NC12)C3=CC=CS3)C(=O)NC(C)C#N</chem>                  |
| IAL-MD0055 | Not measurable | 19.4           | <chem>CC(C)N1N=CC=2C(=CC(=NC12)C3=CC=CS3)C(=O)NC=4C=CN=CC4</chem>              |
| IAL-MD0104 | Not measurable | 18.4           | <chem>CC(C)N1N=CC=2C(=CC(=NC12)C3=CC=CS3)C(=O)N(C)CC=4C=CC=C(O)C4</chem>       |
| IAL-MD0121 | Not measurable | 17.8           | <chem>CC1=NN(C)C=2N=C(C=C(C(=O)NC3CCOCC3)C12)C4=CC=CS4</chem>                  |
| IAL-MD0092 | Not measurable | 17.1           | <chem>CCN1N=CC=2C(=CC(=NC12)C3=CC=CS3)C(=O)NCCNC(=O)C</chem>                   |
| IAL-MD0048 | Not measurable | 15.8           | <chem>CC1=NN(C)C=2N=C(C=C(C(=O)NCC=3C=CC=CN3)C12)C4=CC=CS4</chem>              |
| IAL-MD0049 | Not measurable | 14.3           | <chem>CC(C)N1N=CC=2C(=CC(=NC12)C3=CC=CS3)C(=O)N4CC(=O)NC=5C=CC=CC45</chem>     |
| IAL-MD0066 | Not measurable | 13.5           | <chem>CCN1N=CC=2C(=CC(=NC12)C3=CC=CS3)C(=O)N4CCCC4C=5C=CC(OC)=CC5</chem>       |
| IAL-MD0033 | Not measurable | 12.1           | <chem>COC=1C=CC=C(NC(=O)C=2C=C(N=C3N(N=CC23)C(C)C)C4=CC=CS4)C1</chem>          |
| IAL-MD0026 | Not measurable | 11.1           | <chem>CCN1N=CC=2C(=CC(=NC12)C3=CC=CS3)C(=O)NC4=NC=C(C)S4</chem>                |
| IAL-MD0090 | Not measurable | 11.0           | <chem>CC(C)N1N=CC=2C(=CC(=NC12)C3=CC=CS3)C(=O)NC=4C=CN(C)N4</chem>             |
| IAL-MD0072 | Not measurable | 9.8            | <chem>CC(C)N1N=CC=2C(=CC(=NC12)C3=CC=CS3)C(=O)N4CCN5C=CC=C5C4C</chem>          |
| IAL-MD0117 | Not measurable | 9.7            | <chem>CCN1N=CC=2C(=CC(=NC12)C3=CC=CS3)C(=O)NCC=4C=CC(OC)=NC4</chem>            |
| IAL-MD0065 | Not measurable | 9.5            | <chem>CC(C)N1N=CC=2C(=CC(=NC12)C3=CC=CS3)C(=O)N(C)CC=4C=CC=5OCOC5C4</chem>     |
| IAL-MD0037 | Not measurable | 9.3            | <chem>COC=1C=CC(NC(=O)C=2C=C(N=C3ON=C(C)C23)C=4C=CC(C)=CC4)=CC1</chem>         |
| IAL-MD0120 | Not measurable | 8.9            | <chem>CCN1N=CC=2C(=CC(=NC12)C3=CC=CS3)C(=O)NC(C)C=4C=CN=CC4</chem>             |
| IAL-MD0093 | Not measurable | 7.7            | <chem>CCCN(CC(=O)NC=1C=CC=CC1C)C(=O)C=2C=C(N=C3N(CC)N=CC23)C4=CC=CS4</chem>    |
| IAL-MD0097 | Not measurable | 7.7            | <chem>CCN1N=CC=2C(=CC(=NC12)C3=CC=CS3)C(=O)NC=4C=CC(=CC4)C(=O)N</chem>         |
| IAL-MD0056 | Not measurable | 7.0            | <chem>CCN1N=CC=2C(=CC(=NC12)C3=CC=CS3)C(=O)N4CCC(CC4)C(O)C=5C=CC=CC5</chem>    |
| IAL-MD0061 | Not measurable | 7.0            | <chem>CCN1N=CC=2C(=CC(=NC12)C3=CC=CS3)C(=O)NC=4C=CC=C(C4)C5=NN=CO5</chem>      |
| IAL-MD0119 | Not measurable | 6.3            | <chem>CCN1N=CC=2C(=CC(=NC12)C3=CC=CS3)C(=O)NC(C)C=4C=CC=CN4</chem>             |
| IAL-MD0096 | Not measurable | 3.9            | <chem>CCN1N=CC=2C(=CC(=NC12)C=3C=CC=CC3)C(=O)N4CCCC(C)C4</chem>                |
| IAL-MD0060 | Not measurable | 1.9            | <chem>CC(C)N1N=CC=2C(=CC(=NC12)C3=CC=CS3)C(=O)N4CCC=5C=CC=CC5C4</chem>         |
| IAL-MD0123 | Not measurable | 1.8            | <chem>CC(C)N1N=CC=2C(=CC(=NC12)C=3C=CC=CC3)C(=O)N4CCNC(=O)C4</chem>            |
| IAL-MD0018 | Not measurable | Not measurable | <chem>CC(C)N1N=CC=2C(=CC(=NC12)C=3C=CC=CC3)C(=O)NCC4=CC=CS4</chem>             |
| IAL-MD0025 | Not measurable | Not measurable | <chem>CCN1N=CC=2C(=CC(=NC12)C=3C=CC=CC3)C(=O)NC=4C=CC=C(NC(=O)C)C4</chem>      |
| IAL-MD0050 | Not measurable | Not measurable | <chem>CCN1N=CC=2C(=CC(=NC12)C=3C=CC=CC3)C(=O)N4CCOCC4</chem>                   |
| IAL-MD0069 | Not measurable | Not measurable | <chem>CCN1N=CC=2C(=CC(=NC12)C=3C=CC=CC3)C(=O)N4CCN(CC4)C(=O)C=5C=CC=CC5</chem> |
| IAL-MD0082 | Not measurable | Not measurable | <chem>CC(C)N1N=CC=2C(=CC(=NC12)C=3C=CC=CC3)C(=O)N4CCN(CC4)C(=O)C</chem>        |

|                         |                |                                              |                                                                                    |
|-------------------------|----------------|----------------------------------------------|------------------------------------------------------------------------------------|
| IAL-MD0109              | Not measurable | Not measurable                               | <chem>CCN1N=CC=2C(=CC(=NC12)C=3C=CC=CC3)C(=O)N(CC=4C=CC=CN4)C(C)C</chem>           |
| IAL-MD0124              | Not measurable | Not measurable                               | <chem>CC=1C=CC(CN2N=CC=3C(=CC(C)=NC23)C(=O)N4CCNC(=O)C4)=CC1</chem>                |
|                         |                |                                              |                                                                                    |
| <b>Scaffold type IV</b> |                |                                              |                                                                                    |
| IAL-MD0031              | 19.3           | 81.3                                         | <chem>COC=1C=CC(=CC1)C=2C=C(C(=O)O)C=3C=C(NC(=O)C)C=CC3N2</chem>                   |
| IAL-MD0059              | 22.8           | 63.0                                         | <chem>CC(=O)NC=1C=CC(C=CC=2C=C(C(=O)O)C=3C=C(C)C=CC3N2)=CC1</chem>                 |
| IAL-MD0088              | 24.0           | 79.4                                         | <chem>COC=1C=CC(=CC1)C=2C=C(C(=O)N(C)C)C=3C=CC=CC3N2</chem>                        |
| IAL-MD0024              | 68.0           | 60.3                                         | <chem>CONC(=O)C=1C=C(N=C2C=CC=CC12)C=3C=CC(OC)=CC3</chem>                          |
| IAL-MD0029              | 75.9           | 61.2                                         | <chem>COC=1C=CC(=CC1)C=2C=C(C(=O)O)C=3C(C)=CC(C)=CC3N2</chem>                      |
| IAL-MD0030              | Not measurable | 44.7                                         | <chem>COC=1C=CC(=CC1)C=2C=C(C(=O)O)C=3C=CC(OC)=CC3N2</chem>                        |
| IAL-MD0103              | Not measurable | 38.4                                         | <chem>COC=1C=CC(=CC1)C=2C=C(C(=O)NC3CC3)C=4C=CC=CC4N2</chem>                       |
| IAL-MD0094              | Not measurable | 31.9                                         | <chem>COC=1C=CC(=CC1OC)C=2C=C(C(=O)O)C=3C=CC=CC3N2</chem>                          |
| IAL-MD0118              | Not measurable | 25.6                                         | <chem>COC=1C=CC(=CC1)C=2C=C(C(=O)NC=3C=CC=4C=CC=CC4C3)C=5C=CC=CC5N2</chem>         |
| IAL-MD0101              | Not measurable | 25.2                                         | <chem>COC=1C=CC(=CC1)C=2C=C(C(=O)NC=3C=CC=C(C3)S(=O)(=O)N(C)C)C=4C=CC=CC4N2</chem> |
| IAL-MD0099              | Not measurable | 22.2                                         | <chem>COC=1C=CC(=CC1)C=2C=C(C(=O)NCC(F)(F)F)C=3C=CC=CC3N2</chem>                   |
| IAL-MD0098              | Not measurable | 22.0                                         | <chem>CCCNC(=O)C=1C=C(N=C2C=CC=CC12)C=3C=CC(OC)=CC3</chem>                         |
| IAL-MD0058              | Not measurable | 18.7                                         | <chem>COC=1C=CC(=CC1)C=2C=C(C(=O)NC=3C=CC(=CC3)S(=O)(=O)C)C=4C=CC=CC4N2</chem>     |
| IAL-MD0079              | Not measurable | 16.3                                         | <chem>COC=1C=CC(=CC1)C=2C=C(C(=O)NC3=NN=CN3)C=4C=CC=CC4N2</chem>                   |
| IAL-MD0100              | Not measurable | 15.9                                         | <chem>COC=1C=CC(=CC1)C=2C=C(C(=O)NC=3C=CC=NC3)C=4C=CC=CC4N2</chem>                 |
| IAL-MD0034              | Not measurable | 8.9                                          | <chem>COC=1C=CC(=CC1)C=2C=C(C(=O)NC=3C=CC=C(OCC(=O)N)C3)C=4C=CC=CC4N2</chem>       |
| IAL-MD0035              | Not measurable | 6.8                                          | <chem>CCC(C)NC(=O)C=1C=C(N=C2C=CC=CC12)C=3C=CC(OC)=CC3</chem>                      |
| IAL-MD0089              | Not measurable | 5.7                                          | <chem>OC(=O)C=1C=C(N=C2C=CC=CC12)C=3C=CC(OC(F)F)=CC3</chem>                        |
|                         |                |                                              |                                                                                    |
| <b>Singletons</b>       |                |                                              |                                                                                    |
| IAL-MD0017              | 12.6           | 79.6                                         | <chem>O=C(C1=C(N)C2=CC=C(C3=NC=CC=C3)N=C2S1)NC4CC4</chem>                          |
| IAL-MD0129              | 14.2           | Not measurable due to compound precipitation | <chem>N#CC1=CC=CC=C1C2=CC=C(C3=NC=CN3CC4CN(C)CC4)O2</chem>                         |
| IAL-MD0127              | 38.0           | 66.5                                         | <chem>O=C(C(O1)=C(C)C2=C1C(OCC)=C(OCC)C=C2)N[C@H]3[C@H](O)CNCC3.[H]Cl</chem>       |

**Table S5. Hit compounds from FDA-approved compound library screen.**

| Compound library ID               | Compound internal ID | NSP3 Mac1 inhibition at 50 $\mu$ M (%) | Error (%) |
|-----------------------------------|----------------------|----------------------------------------|-----------|
| Sennoside A                       | ---                  | 112.4                                  | 0.2       |
| Ceftazidime                       | IAL-MD0001           | 107.9                                  | 0.1       |
| Biotin                            | ---                  | 107.7                                  | 0.2       |
| Ebselen                           | IAL-MD0015           | 107.7                                  | 0.0       |
| Thimerosal                        | IAL-MD0006           | 107.3                                  | 0.1       |
| Chlorophyllide Cu complex Na salt | ---                  | 106.7                                  | 0.4       |
| Pyrithione zinc                   | ---                  | 100.7                                  | 0.1       |
| Nadide                            | ---                  | 99.9                                   | 0.1       |
| Carboplatin                       | IAL-MD0007           | 97.3                                   | 0.0       |
| Cephalosporin C sodium            | IAL-MD0228           | 89.8                                   | 2.2       |
| Cisplatin                         | ---                  | 88.0                                   | 0.4       |
| Methacycline hydrochloride        | IAL-MD0008           | 86.8                                   | 0.3       |
| Hexachlorophene                   | IAL-MD0009           | 85.5                                   | 4.1       |
| Mitoxantrone hydrochloride        | IAL-MD0010           | 81.9                                   | 4.2       |
| Protoporphyrin IX                 | ---                  | 75.0                                   | 1.0       |
| Ceftibuten                        | IAL-MD0002           | 71.6                                   | 0.4       |
| Thioctic acid                     | IAL-MD0011           | 70.9                                   | 4.5       |
| Zinc undecylenate                 | ---                  | 68.0                                   | 0.6       |
| Bismuth subsalicylate             | IAL-MD0012           | 66.0                                   | 21.9      |
| Avobenzone                        | IAL-MD0003           | 61.8                                   | 0.2       |
| Phenylmercuric acetate            | ---                  | 58.1                                   | 4.7       |
| Ethanolamine oleate               | ---                  | 56.1                                   | 2.2       |
| Oxantel pamoate                   | IAL-MD0013           | 55.9                                   | 0.0       |
| Suramin hexasodium                | ---                  | 55.8                                   | 0.7       |
| Candididin                        | ---                  | 50.1                                   | 1.6       |

|                        |            |      |     |
|------------------------|------------|------|-----|
| Ethacridine lactate    | IAL-MD0004 | 49.3 | 1.4 |
| Sodium nitroprusside   | ---        | 46.7 | 0.4 |
| Sulfanilate zinc       | ---        | 44.2 | 0.5 |
| Aztreonam              | IAL-MD0005 | 42.8 | 0.4 |
| Cefepime hydrochloride | IAL-MD0229 | 42.1 | 1.8 |
